# Supplementary material
Source: HighWire-hosted journal article supplement (https://www.rcpjournals.org/highwire/filestream/12490/field_highwire_adjunct_files/2/Dasgupta_supplementary_material_S3.pdf)
Supplement: Dasgupta_supplementary_material_S3.pdf [file Dasgupta_supplementary_material_S3.pdf]

# Acute Oncology Service Referral Form

|                                                                     |                                                          |                                           |                                                          |
|---------------------------------------------------------------------|----------------------------------------------------------|-------------------------------------------|----------------------------------------------------------|
| Name of Patient:                                                    |                                                          | Gender:                                   |                                                          |
| DoB:                                                                |                                                          | Admitting Consultant:                     |                                                          |
| Hospital number:                                                    |                                                          | Known Oncology Consultant:                |                                                          |
| Current ward:                                                       |                                                          | Referrer Name:                            |                                                          |
| Date of admission:                                                  |                                                          | Referrer contact details:                 |                                                          |
| New Cancer diagnosis:                                               | Yes <input type="checkbox"/> No <input type="checkbox"/> | Known Tumour site:                        |                                                          |
| If <b>MUO*/CUP**</b> suspected, has relevant pathway been followed? | Yes <input type="checkbox"/> No <input type="checkbox"/> | Chemotherapy within 6 weeks of admission? | Yes <input type="checkbox"/> No <input type="checkbox"/> |
| If not, please provide reason:                                      |                                                          | Radiotherapy within 6 weeks of admission? | Yes <input type="checkbox"/> No <input type="checkbox"/> |
| Current Oncology problem:                                           |                                                          |                                           |                                                          |
| Describe AOS input required:                                        |                                                          |                                           |                                                          |
| Patient informed of referral to AOS                                 | Yes <input type="checkbox"/>                             |                                           |                                                          |

\*MUO- Malignancy of Undefined primary Origin

CUP\*\* Carcinoma of Unknown Primary

Once complete please email referral form to AOS at:

[acute.oncology@westerntrust.hscni.net](mailto:acute.oncology@westerntrust.hscni.net) (and bleep AOS Clinical Nurse Specialist on XXXX to confirm receipt).

**PLEASE ENSURE ALL SECTIONS ARE COMPLETED TO ALLOW APPROPRIATE TRIAGE**

|                                                              |  |                                         |  |
|--------------------------------------------------------------|--|-----------------------------------------|--|
| <b>AOS staff Only</b><br>Date referral information received: |  | <b>AOS Staff only</b><br>Time received: |  |
|--------------------------------------------------------------|--|-----------------------------------------|--|
